# Supplementary material for: Two-dimensional TiS2 nanosheets for in vivo photoacoustic imaging and photothermal cancer therapy
Source: Royal Society of Chemistry journal article supplement (doi:10.1039/c5nr00893j), 2015-01-01
Supplement: c5nr00893j1.pdf [file c5nr00893j1.pdf]

### Supporting Information

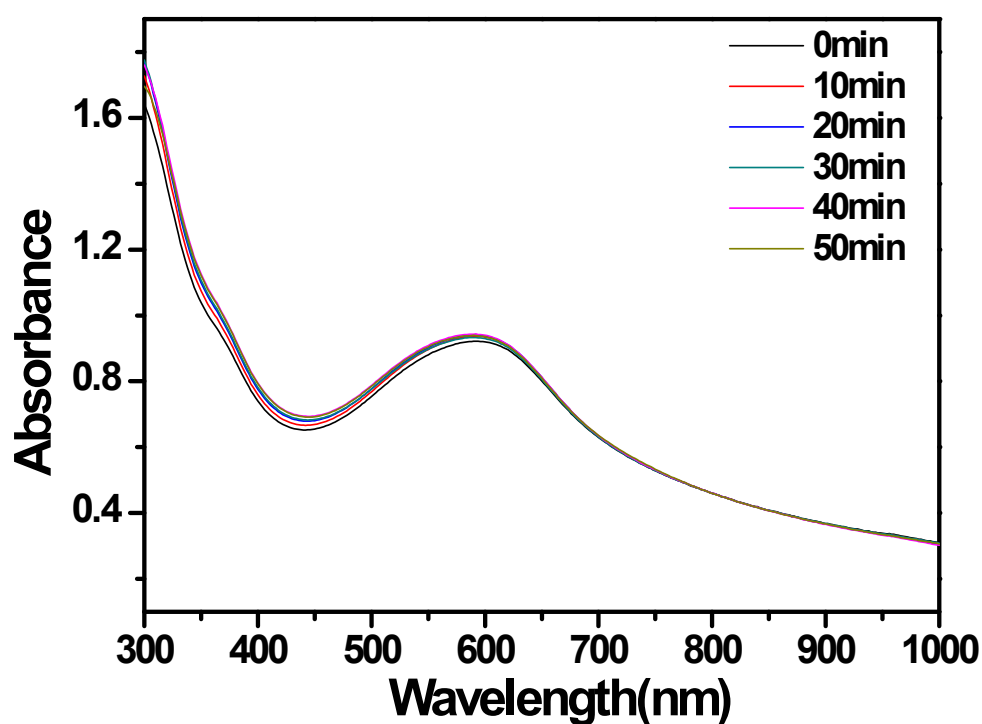

**Supporting Figure S1.** UV-vis-NIR absorbance spectra of the  $\text{TiS}_2$ -PEG solution before and after irradiation by the 808-nm laser at the power density of  $0.8 \text{ W/cm}^2$  for different periods of time.  $\text{TiS}_2$ -PEG showed great stability under a long period of photothermal heating.
